# Supplementary material for: Comprehensive analysis of blood-based biomarkers for predicting immunotherapy benefits in patients with advanced non-small cell lung cancer
Source: PubMed Central journal article supplement — Transl Lung Cancer Res. 2021 May;10(5):2103–17. doi: 10.21037/tlcr-21-100 (PMC8182702; doi:10.21037/tlcr-21-100), 2021-05
Supplement: tlcr-10-05-2103-dss.pdf [file tlcr-10-05-2103-dss.pdf]

## Data Sharing Statement

|                     |                                                                                                                                                     |                                                                                                                                        |
|---------------------|-----------------------------------------------------------------------------------------------------------------------------------------------------|----------------------------------------------------------------------------------------------------------------------------------------|
| <b>Article Info</b> | <a href="http://dx.doi.org/10.21037/tlcr-21-100">http://dx.doi.org/10.21037/tlcr-21-100</a>                                                         |                                                                                                                                        |
| <b>Item</b>         | <b>Question</b>                                                                                                                                     | <b>Authors' Response<br/>(place "-" if not applicable)</b>                                                                             |
| 1                   | Would you like to share data collected for your study to others?                                                                                    | Yes                                                                                                                                    |
| 2                   | If not, would you like to share the reason for your decision?                                                                                       | -                                                                                                                                      |
| 3                   | What data in particular will be shared?                                                                                                             | The datasets used and/or analyzed during the current study is available from the corresponding author on reasonable request.           |
| 4                   | Any other documents will be shared? Such as study protocol, statistical analysis plan, informed consent form, clinical study report, analytic code. | Informed consent form will also be shared if requested.                                                                                |
| 5                   | When will data availability begin?                                                                                                                  | From the publication date.                                                                                                             |
| 6                   | When will data availability end?                                                                                                                    | A year within the publication date.                                                                                                    |
| 7                   | To whom will you share the data?                                                                                                                    | Pulmonologists, thoracic surgeons, pathologists and medical oncologists who are interested in studies of liquid biopsy in lung cancer. |
| 8                   | For what type of analysis or purpose?                                                                                                               | Research purpose only.                                                                                                                 |
| 9                   | How or where can the data/documents be obtained?                                                                                                    | Emails could be sent to the e-mail address of corresponding author to obtain the shared data.                                          |
| 10                  | Any other restrictions?                                                                                                                             | We may balance the potential benefit and risks for each request and then provide the data that could be shared.                        |
