# Supplementary material for: Comprehensive analysis of blood-based biomarkers for predicting immunotherapy benefits in patients with advanced non-small cell lung cancer
Source: PubMed Central journal article supplement — Transl Lung Cancer Res. 2021 May;10(5):2103–17. doi: 10.21037/tlcr-21-100 (PMC8182702; doi:10.21037/tlcr-21-100), 2021-05
Supplement: tlcr-10-05-2103-supplementary.pdf [file tlcr-10-05-2103-supplementary.pdf]

**Table S1** Comparative analysis of CTC counts based on response to immune checkpoint inhibitor treatment

| CTC count per 7.5 mL of blood in each cycle | NDB     | DCB     | P-value |
|---------------------------------------------|---------|---------|---------|
| <b>C1 vs. C2</b>                            |         |         |         |
| C1 < C2 (n=33)                              | 23 (66) | 10 (44) | 0.081   |
| C1 > C2 (n=25)                              | 12 (34) | 13 (57) |         |
| <b>C1 vs. C3</b>                            |         |         |         |
| C1 < C3 (n=14)                              | 8 (44)  | 6 (26)  | 0.219   |
| C1 > C3 (n=27)                              | 10 (56) | 17 (74) |         |
| <b>C1 vs. C4</b>                            |         |         |         |
| C1 < C4 (n=11)                              | 4 (80)  | 7 (32)  | 0.071   |
| C1 > C4 (n=16)                              | 1 (20)  | 15 (68) |         |
| <b>C2 vs. C3</b>                            |         |         |         |
| C2 < C3 (n=11)                              | 6 (32)  | 5 (28)  | 0.800   |
| C2 > C3 (n=26)                              | 13 (68) | 13 (72) |         |
| <b>C2 vs. C4</b>                            |         |         |         |
| C2 < C4 (n=11)                              | 5 (83)  | 6 (35)  | 0.059   |
| C2 > C4 (n=12)                              | 1 (17)  | 11 (65) |         |
| <b>C3 vs. C4</b>                            |         |         |         |
| C3 < C4 (n=6)                               | 2 (40)  | 4 (25)  | 0.450   |
| C3 > C4 (n=15)                              | 3 (60)  | 12 (75) |         |

Values are presented as number (%). NDB, non-durable benefit; DCB, durable clinical benefit; C1, cycle one C2, Cycle two.; CTC, circulating tumor cell.

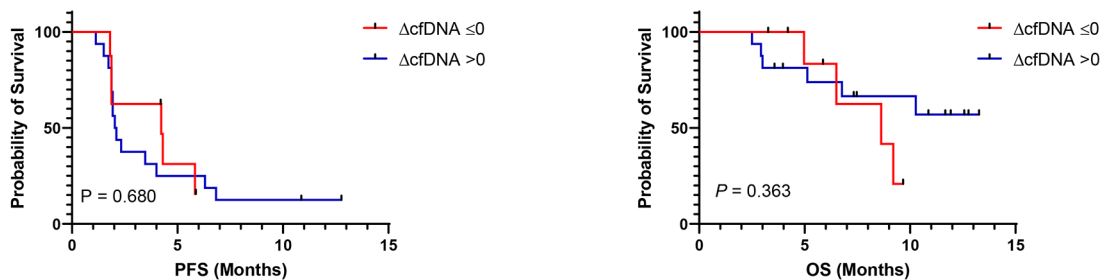

**Figure S1** Survival analysis based on cfDNA levels during ICI treatment. PFS and OS analyses based on relative changes in the cfDNA levels from C1 to C4 ( $\Delta\text{cfDNA}$ ). cfDNA, circulating cell-free DNA; ICI, immune checkpoint inhibitor; PFS, progression-free survival; OS, overall survival; C1, cycle one; C2, cycle 2.

**Table S2** Univariate and multivariate analyses of PFS and OS

| Variables                                     | Univariate HR for PFS | 95% CI    | P-value | Multivariate HR for PFS | 95% CI    | P-value | Univariate HR for OS | 95% CI    | P-value | Multivariate HR for OS | 95% CI    | P-value |
|-----------------------------------------------|-----------------------|-----------|---------|-------------------------|-----------|---------|----------------------|-----------|---------|------------------------|-----------|---------|
| Age                                           | 0.97                  | 0.95–1.00 | 0.072   | -                       | -         | -       | 1.02                 | 0.98–1.06 | 0.292   | -                      | -         | -       |
| Sex: Male (vs. Female)                        | 0.62                  | 0.36–1.06 | 0.081   | 0.30                    | 0.12–0.74 | 0.009   | 0.68                 | 0.35–1.32 | 0.255   | 0.37                   | 0.13–1.01 | 0.051   |
| Smoking (vs. Never smoker, n=17)              |                       |           |         |                         |           |         |                      |           |         |                        |           |         |
| Current smoker (n=29)                         | 0.44                  | 0.23–0.84 | 0.013   | -                       | -         | -       | 0.82                 | 0.37–1.81 | 0.621   | -                      | -         | -       |
| Ex-smoker (n=37)                              | 0.53                  | 0.29–0.98 | 0.044   | -                       | -         | -       | 0.65                 | 0.29–1.43 | 0.281   | -                      | -         | -       |
| EGFR mutation (vs. Activating mutation, n=16) |                       |           |         |                         |           |         |                      |           |         |                        |           |         |
| Wild-type (n=50)                              | 0.43                  | 0.23–0.80 | 0.007   | 0.43                    | 0.18–1.03 | 0.059   | 0.85                 | 0.36–1.97 | 0.696   | -                      | -         | -       |
| PD-L1 IHC TPS (vs. <50%)                      |                       |           |         |                         |           |         |                      |           |         |                        |           |         |
| 22C3: ≥50% (n=28)                             | 0.44                  | 0.24–0.80 | 0.007   | -                       | -         | -       | 0.60                 | 0.29–1.24 | 0.167   | -                      | -         | -       |
| SP263: ≥50% (n=20)                            | 0.38                  | 0.20–0.73 | 0.004   | -                       | -         | -       | 0.63                 | 0.29–1.39 | 0.255   | -                      | -         | -       |
| CTC count (vs. C1 < C2)                       |                       |           |         |                         |           |         |                      |           |         |                        |           |         |
| C1>C2 (n=25)                                  | 0.59                  | 0.33–1.08 | 0.086   | 0.33                    | 0.14–0.78 | 0.012   | 0.37                 | 0.16–0.89 | 0.027   | 0.27                   | 0.08–0.93 | 0.038   |
| Baseline (C1) NLR (vs. >4.0)                  |                       |           |         |                         |           |         |                      |           |         |                        |           |         |
| ≤4.0 (n=49)                                   | 0.59                  | 0.36–0.98 | 0.042   | -                       | -         | -       | 0.52                 | 0.28–0.99 | 0.048   | -                      | -         | -       |
| Baseline (C1) dNLR (vs. >2.0)                 |                       |           |         |                         |           |         |                      |           |         |                        |           |         |
| ≤2.0 (n=42)                                   | 0.54                  | 0.33–0.89 | 0.016   | 0.41                    | 0.18–0.92 | 0.031   | 0.38                 | 0.20–0.74 | 0.004   | 0.25                   | 0.07–0.92 | 0.038   |
| Baseline (C1) PLR (vs. >210)                  |                       |           |         |                         |           |         |                      |           |         |                        |           |         |
| ≤210 (n=42)                                   | 0.53                  | 0.32–0.87 | 0.012   | -                       | -         | -       | 0.41                 | 0.22–0.80 | 0.008   | -                      | -         | -       |
| Baseline (C1) cfDNA (vs. >5.8)                |                       |           |         |                         |           |         |                      |           |         |                        |           |         |
| ≤5.8 (n=9)                                    | 0.43                  | 0.15–1.21 | 0.110   | -                       | -         | -       | 0.11                 | 0.01–0.89 | 0.039   | -                      | -         | -       |

PFS, progression-free survival; CI, confidence interval; OS, overall survival; EGFR, epidermal growth factor receptor; IHC, immunohistochemistry; TPS, tumor proportional score; CTC, circulating tumor cell; NLR, neutrophil-to-lymphocyte ratio; dNLR, derived neutrophil-to-lymphocyte ratio; PLR, platelet-to-lymphocyte ratio; cfDNA, circulating cell-free DNA; HR, hazard ratio; C1, cycle one; C2, cycle 2.

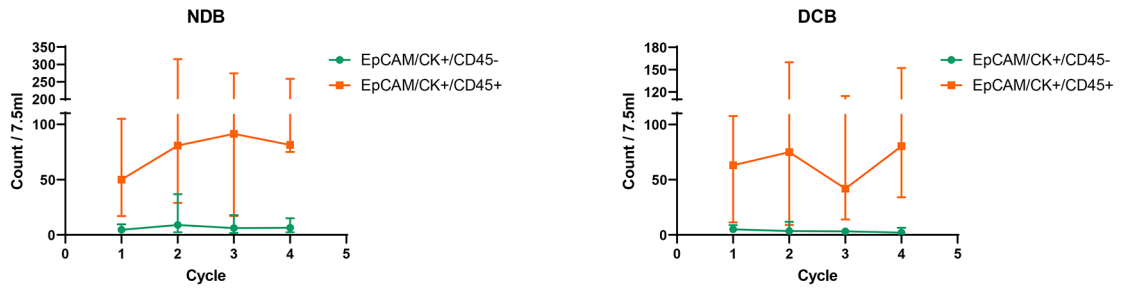

**Figure S2** Dynamic changes in counts of CTCs (EpCAM/CK+/CD45-) and triple-positive cells (EpCAM/CK+/CD45+) during ICI treatment. CTC, circulating tumor cell; EpCAM, epithelial cell adhesion molecule; CK, cytokeratin; ICI, immune checkpoint inhibitor; NDB, non-durable benefit; DCB, durable clinical benefit.
